# Supplementary material
Source: PubMed Central journal article supplement (PMC5026574)
Supplement: NIHMS800944-supplement-Supplemental.pdf [file NIHMS800944-supplement-Supplemental.pdf]

## **Supporting Information**

### **A Genetically Encoded FRET Sensor for Hypoxia and Prolyl Hydroxylases**

Suzan Youssef, Wei Ren, and Hui-wang Ai\*

Department of Chemistry, University of California at Riverside, 501 Big Springs Road, Riverside, CA 92521, United States of America

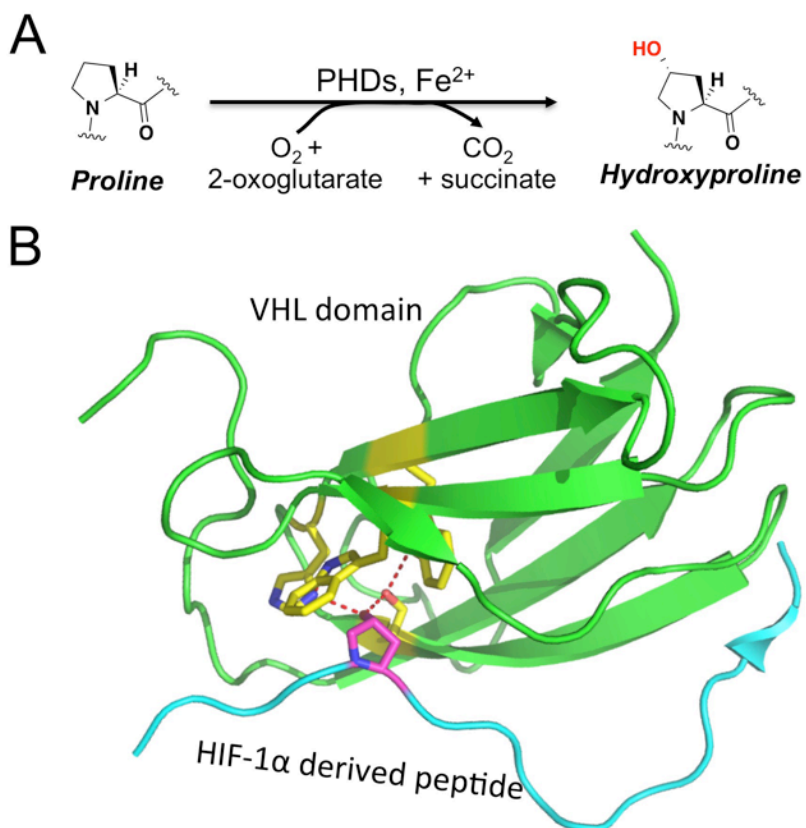

**Figure S1.** (A) Chemical reaction for conversion of proline into 4-hydroxyproline by prolyl hydroxylase domain enzymes (PHDs). (B) Interactions between a VHL domain (residues 60-154) and a HIF-1 $\alpha$  derived peptide, showing several interfacial H-bonds through the hydroxyl group of 4-hydroxyproline (residue 564). The structure is redrawn based on Protein Data Bank (PDB) entry 4AJY.

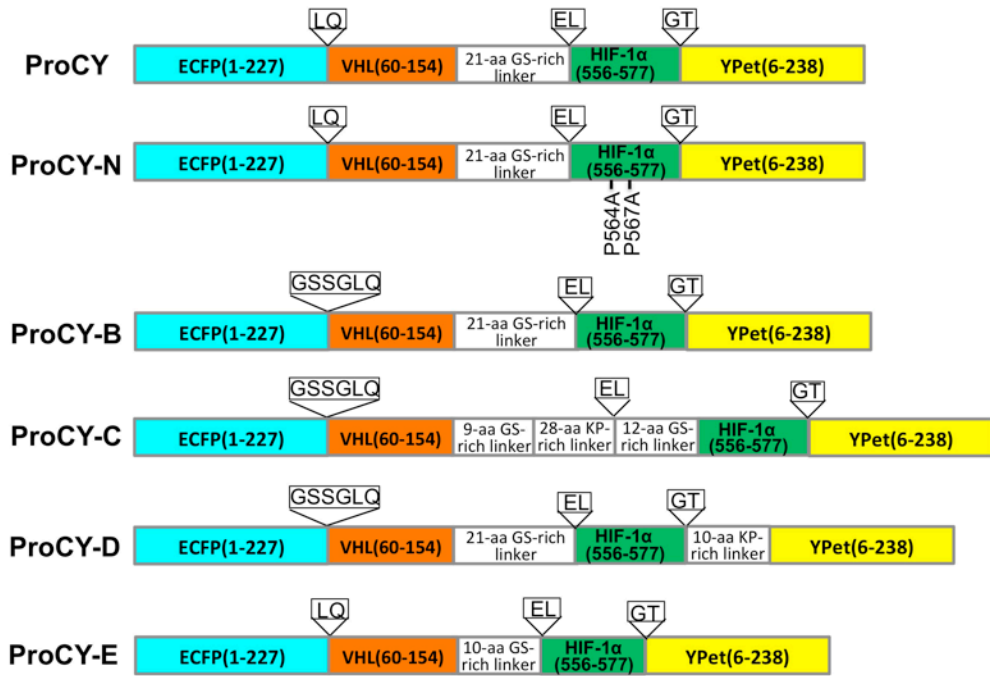

**Figure S2.** Domain arrangements of biosensors constructed in this study. Residues are numbered by following PDB entries 2WSN and 4AJY.

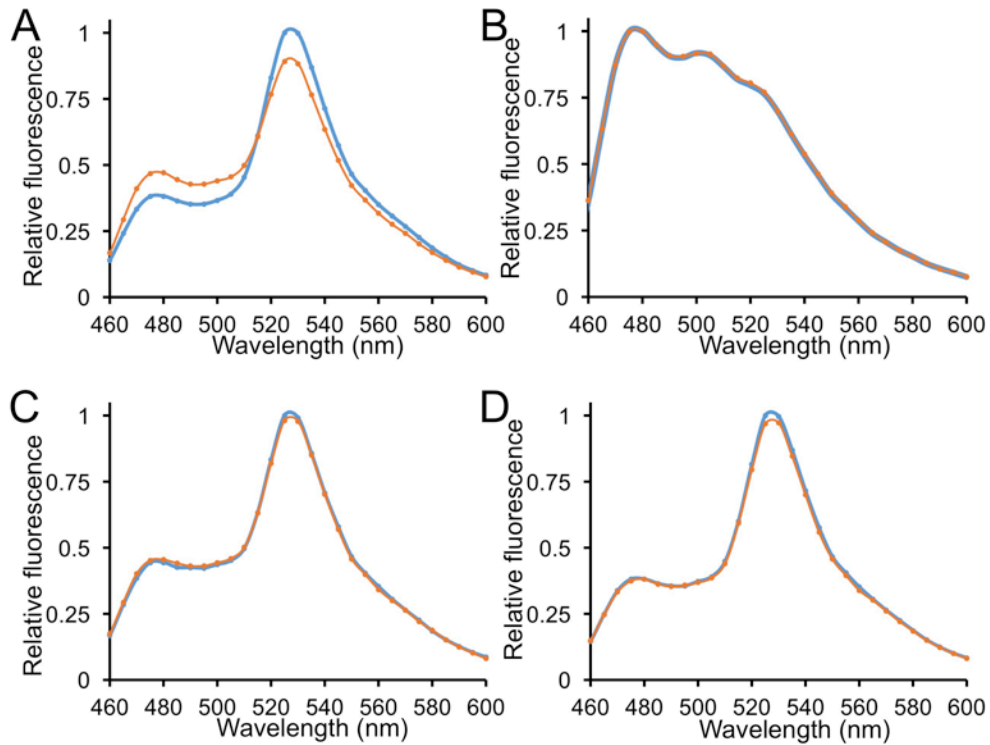

**Figure S3.** Fluorescent emission spectra for (A) ProCY-B, (B) ProCY-C, (C) ProCY-D, and (D) ProCY-E before (blue) and after (orange) treatment with a catalytically active PHD2 fragment.

```

ProCY      MRGSHHHHHHGMASMTGGQQMGRDLYENLYFQGSMSVSKGEELFTGVVPILEVELDGDVNG
ProCY-N    MRGSHHHHHHGMASMTGGQQMGRDLYENLYFQGSMSVSKGEELFTGVVPILEVELDGDVNG
ProCY-B    MRGSHHHHHHGMASMTGGQQMGRDLYENLYFQGSMSVSKGEELFTGVVPILEVELDGDVNG
ProCY-C    MRGSHHHHHHGMASMTGGQQMGRDLYENLYFQGSMSVSKGEELFTGVVPILEVELDGDVNG
ProCY-D    MRGSHHHHHHGMASMTGGQQMGRDLYENLYFQGSMSVSKGEELFTGVVPILEVELDGDVNG
ProCY-E    MRGSHHHHHHGMASMTGGQQMGRDLYENLYFQGSMSVSKGEELFTGVVPILEVELDGDVNG

ProCY      HRFSVSGEGEGDATYGKLTLLKFICTTGKLPVPWPTLVTTLTWGVQCFSRYPDHMKQHDFD
ProCY-N    HRFSVSGEGEGDATYGKLTLLKFICTTGKLPVPWPTLVTTLTWGVQCFSRYPDHMKQHDFD
ProCY-B    HRFSVSGEGEGDATYGKLTLLKFICTTGKLPVPWPTLVTTLTWGVQCFSRYPDHMKQHDFD
ProCY-C    HRFSVSGEGEGDATYGKLTLLKFICTTGKLPVPWPTLVTTLTWGVQCFSRYPDHMKQHDFD
ProCY-D    HRFSVSGEGEGDATYGKLTLLKFICTTGKLPVPWPTLVTTLTWGVQCFSRYPDHMKQHDFD
ProCY-E    HRFSVSGEGEGDATYGKLTLLKFICTTGKLPVPWPTLVTTLTWGVQCFSRYPDHMKQHDFD

ProCY      KSAMPEGYVQERTIFFKDDGNYKTRAEVKFEGDTLVNRIELKGI DFKEDGNILGHKLEYN
ProCY-N    KSAMPEGYVQERTIFFKDDGNYKTRAEVKFEGDTLVNRIELKGI DFKEDGNILGHKLEYN
ProCY-B    KSAMPEGYVQERTIFFKDDGNYKTRAEVKFEGDTLVNRIELKGI DFKEDGNILGHKLEYN
ProCY-C    KSAMPEGYVQERTIFFKDDGNYKTRAEVKFEGDTLVNRIELKGI DFKEDGNILGHKLEYN
ProCY-D    KSAMPEGYVQERTIFFKDDGNYKTRAEVKFEGDTLVNRIELKGI DFKEDGNILGHKLEYN
ProCY-E    KSAMPEGYVQERTIFFKDDGNYKTRAEVKFEGDTLVNRIELKGI DFKEDGNILGHKLEYN

ProCY      YISHNVYITADKQKNGIKAHFKIRHNIEDGSVQLADHYQQNTPIGDGPVLLPDNHYLSLSTQ
ProCY-N    YISHNVYITADKQKNGIKAHFKIRHNIEDGSVQLADHYQQNTPIGDGPVLLPDNHYLSLSTQ
ProCY-B    YISHNVYITADKQKNGIKAHFKIRHNIEDGSVQLADHYQQNTPIGDGPVLLPDNHYLSLSTQ
ProCY-C    YISHNVYITADKQKNGIKAHFKIRHNIEDGSVQLADHYQQNTPIGDGPVLLPDNHYLSLSTQ
ProCY-D    YISHNVYITADKQKNGIKAHFKIRHNIEDGSVQLADHYQQNTPIGDGPVLLPDNHYLSLSTQ
ProCY-E    YISHNVYITADKQKNGIKAHFKIRHNIEDGSVQLADHYQQNTPIGDGPVLLPDNHYLSLSTQ

ProCY      SALS KDPNEKRDMVLEFVTA----LQRPVLRVNSREPSQVIFCNRSRPRVLPVWLN
ProCY-N    SALS KDPNEKRDMVLEFVTA----LQRPVLRVNSREPSQVIFCNRSRPRVLPVWLN
ProCY-B    SALS KDPNEKRDMVLEFVTAAGGSGLQRPVLRVNSREPSQVIFCNRSRPRVLPVWLN
ProCY-C    SALS KDPNEKRDMVLEFVTAAGGSGLQRPVLRVNSREPSQVIFCNRSRPRVLPVWLN
ProCY-D    SALS KDPNEKRDMVLEFVTAAGGSGLQRPVLRVNSREPSQVIFCNRSRPRVLPVWLN
ProCY-E    SALS KDPNEKRDMVLEFVTA----LQRPVLRVNSREPSQVIFCNRSRPRVLPVWLN

ProCY      FDGEPQPYPTLPPGTGRRISHSYRGLWLF RDAGTHDGLLVNQTELFVPSLNVDGQPIFAN
ProCY-N    FDGEPQPYPTLPPGTGRRISHSYRGLWLF RDAGTHDGLLVNQTELFVPSLNVDGQPIFAN
ProCY-B    FDGEPQPYPTLPPGTGRRISHSYRGLWLF RDAGTHDGLLVNQTELFVPSLNVDGQPIFAN
ProCY-C    FDGEPQPYPTLPPGTGRRISHSYRGLWLF RDAGTHDGLLVNQTELFVPSLNVDGQPIFAN
ProCY-D    FDGEPQPYPTLPPGTGRRISHSYRGLWLF RDAGTHDGLLVNQTELFVPSLNVDGQPIFAN
ProCY-E    FDGEPQPYPTLPPGTGRRISHSYRGLWLF RDAGTHDGLLVNQTELFVPSLNVDGQPIFAN

ProCY      ITLPGSAGSSAGG-----SAGGSAGSAGGELDL DLEM
ProCY-N    ITLPGSAGSSAGG-----SAGGSAGSAGGELDL DLEM
ProCY-B    ITLPGSAGSSAGG-----SAGGSAGSAGGELDL DLEM
ProCY-C    ITLPGSAGSSAGGKPKPKPKPKPKELPKPKPKPKPKPKPAGGSAGSAGGKLDLDLEM
ProCY-D    ITLPGSAGSSAGG-----SAGGSAGSAGGELDL DLEM
ProCY-E    ITLPGSAGSSAG-----GSELDLDLEM

ProCY      LAPIYIMDDDFQLRSFGT-----ELFTGVVPILEVELDGDVNGHKFVSVEGEGDA
ProCY-N    LAAYIAMDDDFQLRSFGT-----ELFTGVVPILEVELDGDVNGHKFVSVEGEGDA
ProCY-B    LAPIYIMDDDFQLRSFGT-----ELFTGVVPILEVELDGDVNGHKFVSVEGEGDA
ProCY-C    LAPIYIMDDDFQLRSFGT-----ELFTGVVPILEVELDGDVNGHKFVSVEGEGDA
ProCY-D    LAPIYIMDDDFQLRSFGTKPKPKPKPKPELFTGVVPILEVELDGDVNGHKFVSVEGEGDA
ProCY-E    LAPIYIMDDDFQLRSFGT-----ELFTGVVPILEVELDGDVNGHKFVSVEGEGDA

ProCY      TYGKLTLLKLLCTTGKLPVPWPTLVTTTLGYGVQCFARYPDHMKQHDFFKSAMPEGYVQERT
ProCY-N    TYGKLTLLKLLCTTGKLPVPWPTLVTTTLGYGVQCFARYPDHMKQHDFFKSAMPEGYVQERT
ProCY-B    TYGKLTLLKLLCTTGKLPVPWPTLVTTTLGYGVQCFARYPDHMKQHDFFKSAMPEGYVQERT
ProCY-C    TYGKLTLLKLLCTTGKLPVPWPTLVTTTLGYGVQCFARYPDHMKQHDFFKSAMPEGYVQERT
ProCY-D    TYGKLTLLKLLCTTGKLPVPWPTLVTTTLGYGVQCFARYPDHMKQHDFFKSAMPEGYVQERT
ProCY-E    TYGKLTLLKLLCTTGKLPVPWPTLVTTTLGYGVQCFARYPDHMKQHDFFKSAMPEGYVQERT

ProCY      IFFKDDGNYKTRAEVKFEGDTLVNRIELKGI DFKEDGNILGHKLEYNYNHNVYITADKQ
ProCY-N    IFFKDDGNYKTRAEVKFEGDTLVNRIELKGI DFKEDGNILGHKLEYNYNHNVYITADKQ
ProCY-B    IFFKDDGNYKTRAEVKFEGDTLVNRIELKGI DFKEDGNILGHKLEYNYNHNVYITADKQ
ProCY-C    IFFKDDGNYKTRAEVKFEGDTLVNRIELKGI DFKEDGNILGHKLEYNYNHNVYITADKQ
ProCY-D    IFFKDDGNYKTRAEVKFEGDTLVNRIELKGI DFKEDGNILGHKLEYNYNHNVYITADKQ
ProCY-E    IFFKDDGNYKTRAEVKFEGDTLVNRIELKGI DFKEDGNILGHKLEYNYNHNVYITADKQ

ProCY      KNGIKANFKIRHNIEDGGVQLADHYQQNTPIGDGPVLLPDNHYLSYQSALFKDPNEKRKH
ProCY-N    KNGIKANFKIRHNIEDGGVQLADHYQQNTPIGDGPVLLPDNHYLSYQSALFKDPNEKRKH
ProCY-B    KNGIKANFKIRHNIEDGGVQLADHYQQNTPIGDGPVLLPDNHYLSYQSALFKDPNEKRKH
ProCY-C    KNGIKANFKIRHNIEDGGVQLADHYQQNTPIGDGPVLLPDNHYLSYQSALFKDPNEKRKH
ProCY-D    KNGIKANFKIRHNIEDGGVQLADHYQQNTPIGDGPVLLPDNHYLSYQSALFKDPNEKRKH
ProCY-E    KNGIKANFKIRHNIEDGGVQLADHYQQNTPIGDGPVLLPDNHYLSYQSALFKDPNEKRKH

ProCY      MVLLEFLTAAGITEGMNELYKEF-
ProCY-N    MVLLEFLTAAGITEGMNELYKEF-
ProCY-B    MVLLEFLTAAGITEGMNELYKEF-
ProCY-C    MVLLEFLTAAGITEGMNELYKEF-
ProCY-D    MVLLEFLTAAGITEGMNELYKEF-
ProCY-E    MVLLEFLTAAGITEGMNELYKEF-

```

**Figure S4.** Alignment of protein sequences of biosensors constructed in this study.

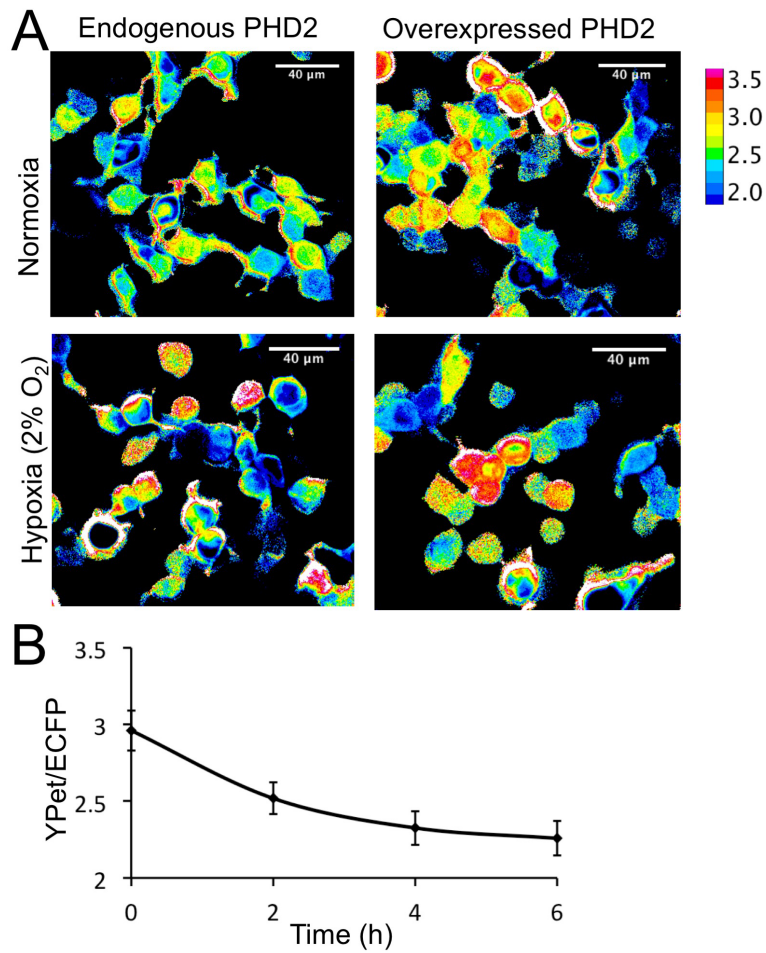

**Figure S5.** (A) Pseudocolored ratio images of representative ProCY-N expressing HEK 293T cells under normoxia or hypoxia. The color bar represents the ratio of sensitized YPet fluorescence emission to direct ECFP donor emission (YPet/ECFP). (B) The time-course of FRET ratios of ProCY expressed in HEK 293 under hypoxia (2% O<sub>2</sub>) in response to re-oxygenation under normoxic conditions.

**Table S1: Oligonucleotides used in this study.**

| Oligo name     | Nucleotide sequence                                              |
|----------------|------------------------------------------------------------------|
| YPet-For       | GATTGGTACCGAGTTATTCAGTGGTGT                                      |
| YPet-Rev       | TTCTAAGCTTAGAATTCTTTGTACAATTCATT                                 |
| ECFP-For       | AGGGCTCGAGCATGGTGAGCAAGGGCGA                                     |
| PVHL-Rev       | CAGCACTGGGCGCTGCAGGGCGGCGGTACGAACTC                              |
| Pst1-For       | CCGCCCTGCAGCGCCAGTGCTGCGCAGC                                     |
| Kpn1-Rev1      | GGGGATGTATGGAGCCAACATCTCTAAATCAAGGTCGAGCTCACCACCTG<br>CTGAACCTGC |
| Kpn-Rev2       | ACTCGGTACCAAACTGCGAAGCTGGAAGTCATCATCCATGGGGATGTAT<br>GGAGCCAA    |
| Kpn-Rev3       | ACCACCTGCTGAACCTGCTCCGCTACCACCGGCAGAGCCACC                       |
| GGSG-For       | GGAGGCAGCGGACGCCAGTGCTGCGCAGC                                    |
| GGSG-Rev       | GCGTCCGCTGCCTCCGGCGGCGGTACGAACTC                                 |
| MidFloppy-R    | GAATGAGCTCTTTAGGCTTAGGTTGGGCTTCGGCTTTGGTTGCCACCTG<br>CGCTTGA     |
| MidFloppy-F1   | CTTAGAGCTCCCCAAGCCAAAACCAAGCCCAAGCCGAAGCCAAAGCCG<br>AAGCCC       |
| MidFloppy-F2   | CCAAAGCCGAAGCCCGCCGGTGGTAGCGGAGCAGGTTACAGCAGGTGGTA<br>AGCTC      |
| pBAD-Rev       | GATTTAATCTGTATCAGG                                               |
| HIF-Rigid-F    | ATTAGGTACCAAGCCCAAGCCGAAGCCAAAGCCGAAGCCCGAGTTATTC<br>ACTGGTGT    |
| SacI-Rev       | GGTCGAGCTCAGAGCCACCTGCGCT                                        |
| PAPA-Rev       | ACTCGGTACCAAACTGCGAAGCTGGAAGTCATCATCCATTGCGATGTAA<br>GCAGCCAA    |
| PHD2-Kpn1-F    | CGTGGGTACCATGCCCAACGGGCAGACGAAG                                  |
| PHD2-HindIII-R | AAGCGAAGCTTAGAAGACGTCTTTACCGAC                                   |
| HydpcDNA3-F    | CGCCTAAGCTTGCCGCCACCATGGTGAGCAAGGGCGAG                           |
| HydpcDNA3-R    | ACCTTCTAGATTAGAATTCTTTGTACAATTCATT                               |
| PHD2-pcDNA3-F  | TCGCCTAAGCTTGCCGCCACCATGGGTCCCAACGGGCAGACGAAG                    |
| PHD2-pcDNA3-R  | GATCTCTAGATTAGAAGACGTCTTTACCGACCGA                               |
| mycPHD2-R      | CCCTCTAGATTACAGATCCTCTTCTGAGATGAGTTTTTGTTCGAAGACGTC<br>TTTACCGAC |
| NES-HP-F1      | CCCAAGCTTGCCGCCACCATGGCACTTCAACTCCTCCTTGAACG                     |
| NES-HP-F2      | CAACTTCCTCCTTTGAACGTCTTACTCTTGTGAGCAAGGGCGAGGAG                  |
| NES-HP-XbaI-R  | GCATTCTAGAGAATTCTTTGTACAATTCATT                                  |
| PLJMI-NheI-F   | TCCGCTAGCGCCGCCACCATGGGAGCAAGGGCGAGG                             |
| pHP-Nuc-R      | TCAGCTCGAGAGAACTCTTTGTACAATTCATT                                 |
